# Supplementary material
Source: Springer Nature journal article supplement (https://www.springermedizin.de/resource/supplementary/12882_2013_715_MOESM4_ESM.pdf/9454510)

A.

## Concentration inlet

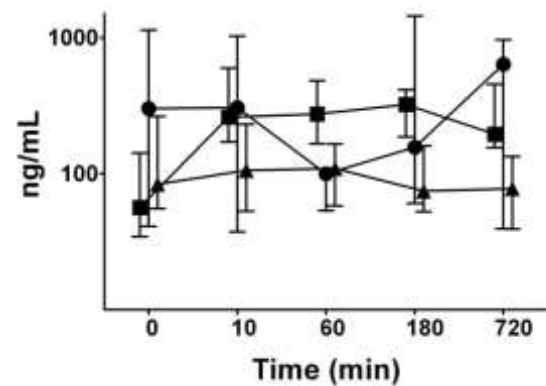

B.

## Concentration outlet

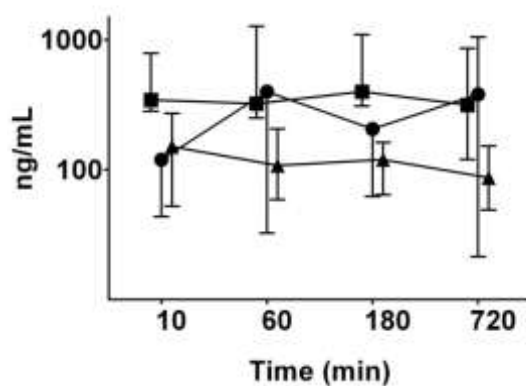

C.

## Total mass production rate

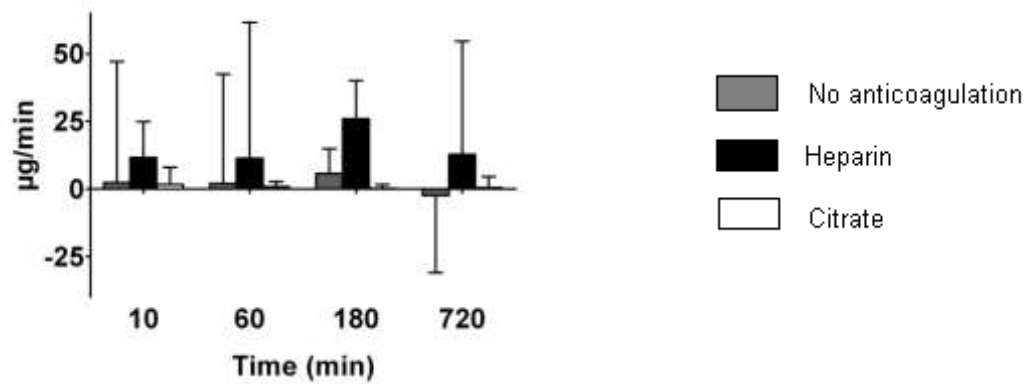

Supplement: MOESM4 [file 9454510]
